# Supplementary material for: Increased Stiffness Is the Major Early Abnormality in a Pig Model of Severe Aortic Stenosis and Predisposes to Congestive Heart Failure in the Absence of Systolic Dysfunction
Source: PubMed Central journal article supplement — J Am Heart Assoc. 2015 May 20;4(5):e001925. doi: 10.1161/JAHA.115.001925 (PMC4599422; doi:10.1161/jaha.115.001925), 2015-05-20
Supplement: jah30004-e001925-sd1.pdf [file jah30004-e001925-sd1.pdf]

SUPPLEMENTAL MATERIAL

Figure S1. Cited in Methods: echocardiographic analysis

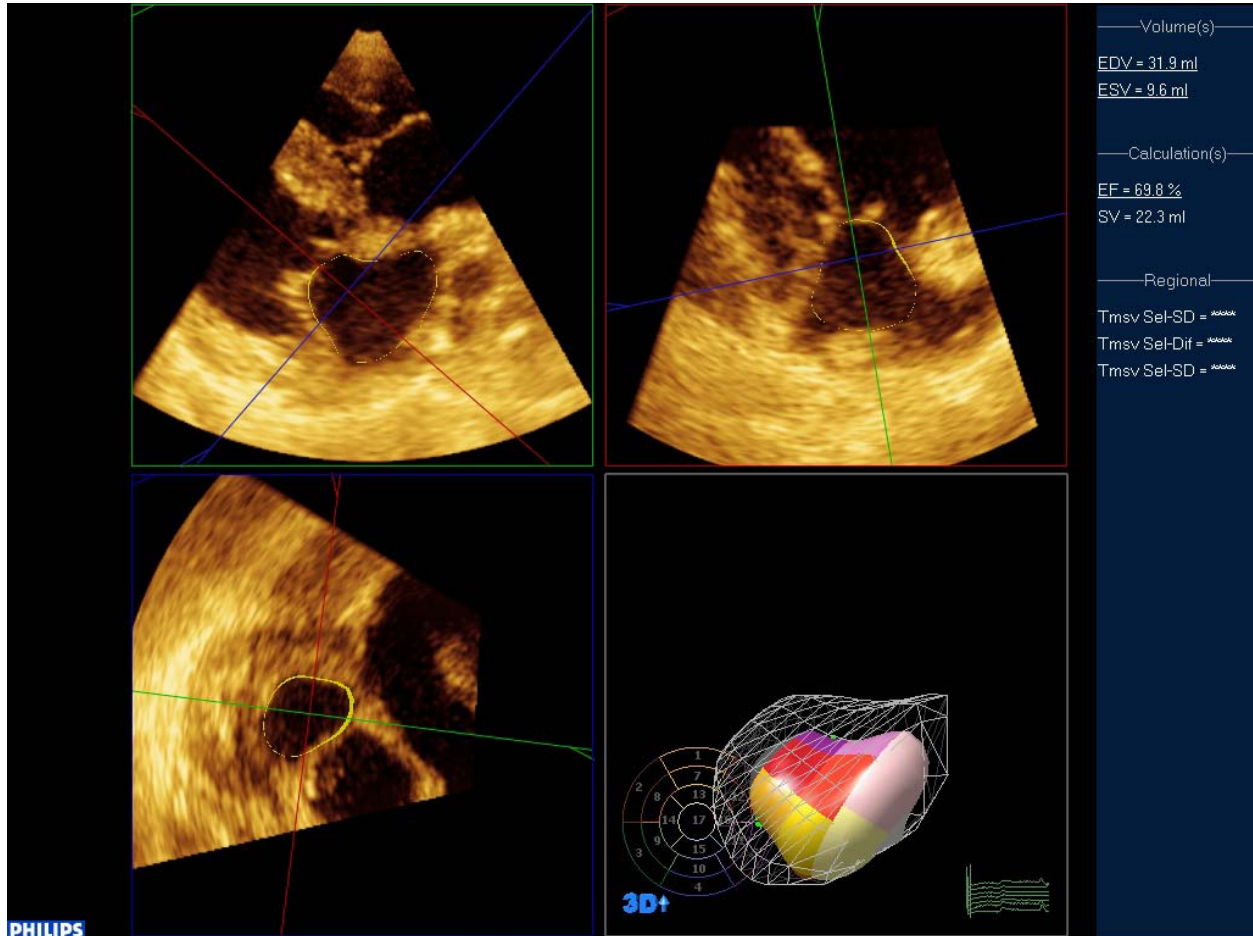

An example of three-dimensional left atrial volume analysis.

Bottom right figure shows the mesh (maximum volume) and color (minimum volume) of the left atrium.
